# Supplementary material for: Delithiation/lithiation behaviors of three polymorphs of LiVOPO4
Source: Royal Society of Chemistry journal article supplement (doi:10.1039/c8cc07446a), 2018-01-01
Supplement: c8cc07446a1.pdf [file c8cc07446a1.pdf]

## Supporting Information

### Delithiation/Lithiation Behaviors of Three Polymorphs of LiVOPO<sub>4</sub>

Guang He,<sup>a,b</sup> Wang Hay Kan,<sup>c</sup> and Arumugam Manthiram<sup>\*a</sup>

<sup>a</sup>Materials Science and Engineering Program & Texas Materials Institute, The University of Texas at Austin, Austin, TX, 78712, USA

<sup>b</sup>Institute for New Energy Materials and Low-Carbon Technology, Tianjin University of Technology, Tianjin, 300384, P.R. China

<sup>c</sup>China Spallation Neutron Source, Institute of High Energy Physics, Dongguan, Guangdong, 523803, P.R. China

**Synthesis of  $\alpha$ -LiVOPO<sub>4</sub> and  $\beta$ -LiVOPO<sub>4</sub>:** Both triclinic  $\alpha$ -LiVOPO<sub>4</sub> and orthorhombic  $\beta$ -LiVOPO<sub>4</sub> were synthesized by a sol-gel process with some modifications.<sup>18,19</sup>  $\alpha$ -LiVOPO<sub>4</sub> was prepared with LiNO<sub>3</sub> as the lithium source, V<sub>2</sub>O<sub>5</sub> as the vanadium source, NH<sub>4</sub>H<sub>2</sub>PO<sub>4</sub> as the phosphate source, and citric acid as the chelator, while LiNO<sub>3</sub> and citric acid were replaced by lithium acetate and oxalic acid for the preparation of the  $\beta$ -LiVOPO<sub>4</sub>. The resulting gels were calcined at 600 °C and 500 °C in air, respectively, for 10 h to obtain  $\alpha$ -LiVOPO<sub>4</sub> and orthorhombic  $\beta$ -LiVOPO<sub>4</sub>.

**Synthesis of  $\alpha_1$ -LiVOPO<sub>4</sub>:** Tetragonal  $\alpha_1$ -LiVOPO<sub>4</sub> was synthesized by a microwave-assisted solvothermal (MT-SW) method.<sup>35</sup> Briefly, V<sub>2</sub>O<sub>5</sub> was first dissolved in oxalic acid dehydrate (1:3) in deionized water at elevated temperatures. Next, LiOH·H<sub>2</sub>O, phosphoric acid (85%), and ethanol were added in sequence under stirring ( $V_{\text{H}_2\text{O}}:V_{\text{EtOH}} = 1:1$ ). The V concentration was kept at 0.067 M, and Li:V:P = 1.8 : 1 : 1. The microwave reaction was allowed for ~ 50 min, including approximately 20 – 25 min of ramping time to the desired temperature/pressure. Finally, the products were collected and washed with water and acetone.

**Synthesis of  $\alpha$ -LiVOPO<sub>4</sub> nanoparticles:**  $\alpha$ -LiVOPO<sub>4</sub> nanoparticles were synthesized using ordered macroporous carbon as the hard template. The carbon was first prepared as described elsewhere.<sup>38</sup> Then, it was immersed into the precursor solutions to allow the penetration.  $\alpha$ -LiVOPO<sub>4</sub> nanoparticles were formed after calcination in air, during which the carbon template was combusted in the furnace.

**Chemical delithiation:** Chemical delithiation was performed with three forms of LiVOPO<sub>4</sub> using nitronium tetrafluoroborate (NO<sub>2</sub>BF<sub>4</sub>) in the media of pre-dried acetonitrile in Ar atmosphere. For  $\beta$ - and  $\alpha_1$ -LiVOPO<sub>4</sub>, 50% excess (molar ratio) NO<sub>2</sub>BF<sub>4</sub> was sufficient to produce pure  $\beta$ - and  $\alpha_1$ -VOPO<sub>4</sub>, while multiple delithiation was necessary for the complete delithiation of the  $\alpha$ -LiVOPO<sub>4</sub>. All the products were washed by acetonitrile twice after the reactions and kept in a vacuum oven at 150 °C for further use.

**Chemical lithiation:** Chemical lithiation was performed with three forms of LiVOPO<sub>4</sub> using n-butyllithium in pre-dried hexane under Ar atmosphere. Typically, ~ 5% excess n-butyllithium was added to ensure a complete lithiation. The reactions were allowed for 24 h, centrifuged with dry hexane twice, and stored in a glove box for further use.

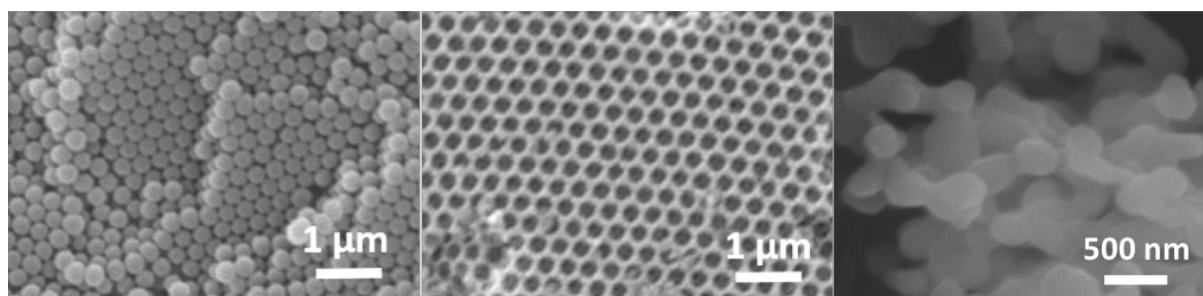

Figure S1 SEM images of poly(methyl methacrylate) spheres (left), the ordered macroporous carbon replica (middle), and the templated resulting  $\alpha$ -LiVOPO<sub>4</sub> nanoparticles (right).

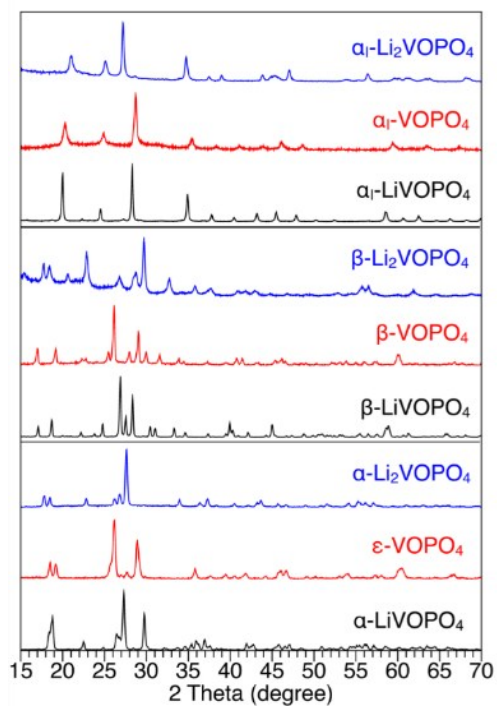

Figure S2 XRD patterns of the three  $\text{LiVOPO}_4$  samples and the chemically delithiated  $\text{VOPO}_4$  and chemically lithiated  $\text{Li}_2\text{VOPO}_4$ .

| $\alpha$ -                            | ICP (Li:V:P) | $\beta$ -                            | ICP (Li:V:P) | $\alpha_1$ -                            | ICP (Li:V:P) |
|---------------------------------------|--------------|--------------------------------------|--------------|-----------------------------------------|--------------|
| $\alpha$ - $\text{LiVOPO}_4$          | 1.02:1.02:1  | $\beta$ - $\text{LiVOPO}_4$          | 1.03:0.99:1  | $\alpha_1$ - $\text{LiVOPO}_4$          | 1.10:0.92:1  |
| $\epsilon$ - $\text{VOPO}_4$          | 0.002:1.02:1 | $\beta$ - $\text{VOPO}_4$            | 0.03:0.98:1  | $\alpha_1$ - $\text{VOPO}_4$            | 0.03:0.92:1  |
| $\alpha$ - $\text{Li}_2\text{VOPO}_4$ | 2.04:1.02:1  | $\beta$ - $\text{Li}_2\text{VOPO}_4$ | 2.05:0.99:1  | $\alpha_1$ - $\text{Li}_2\text{VOPO}_4$ | 2.07:0.93:1  |

Table S1 ICP results of three sets of  $\text{VOPO}_4$ - $\text{LiVOPO}_4$ - $\text{Li}_2\text{VOPO}_4$  upon chemical delithiation and lithiation.

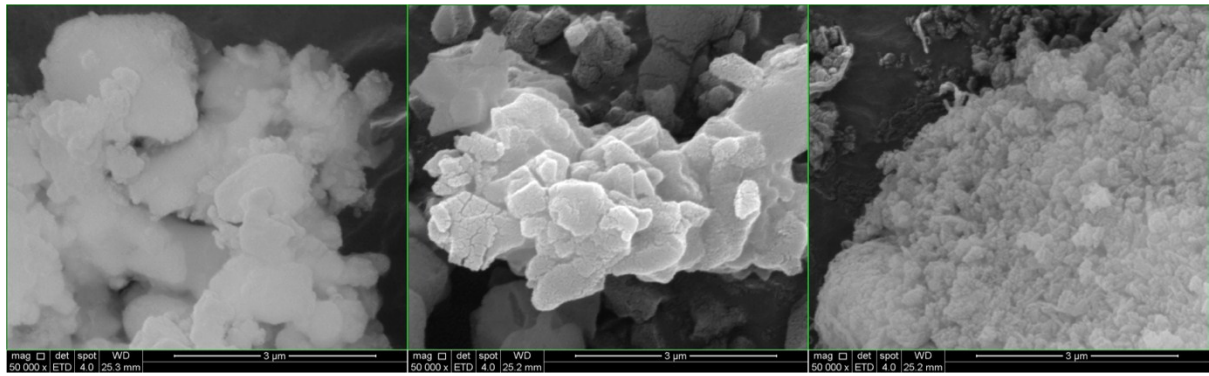

Figure S3 SEM images of  $\alpha$ -LiVOPO<sub>4</sub> (left),  $\beta$ -LiVOPO<sub>4</sub> (middle), and  $\alpha_1$ -LiVOPO<sub>4</sub> (right) upon chemical lithiation with n-butyllithium.

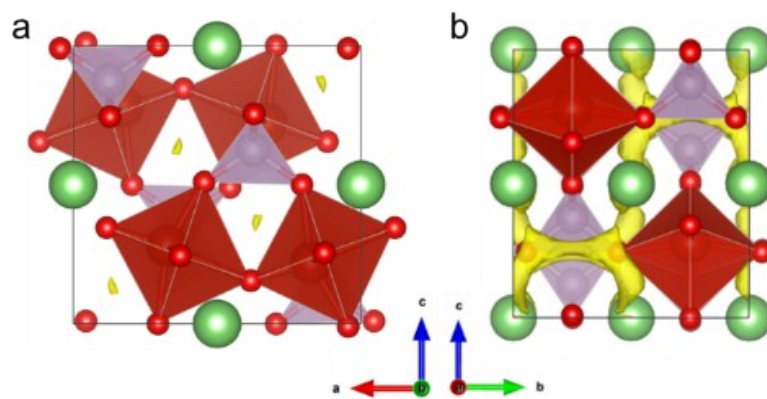

Figure S4. Bond valence sum (BVS) maps of  $\beta$ -LiVOPO<sub>4</sub>, showing the possible positions of the 2<sup>nd</sup> Li in the lattice at mismatch of (a) 0.15 and (b) 0.20.

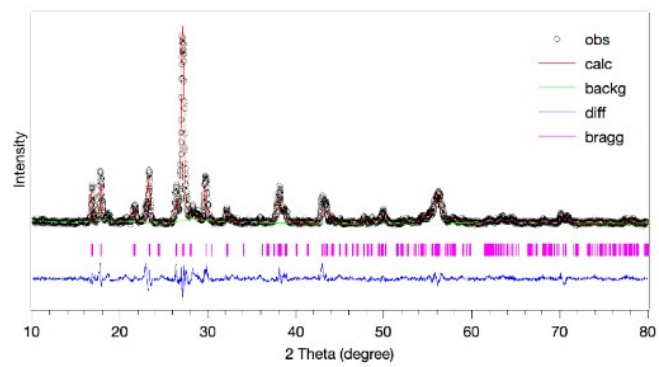

Figure S5. XRD pattern and Rietveld refinement of  $\beta$ - $\text{Li}_2\text{VOPO}_4$ .

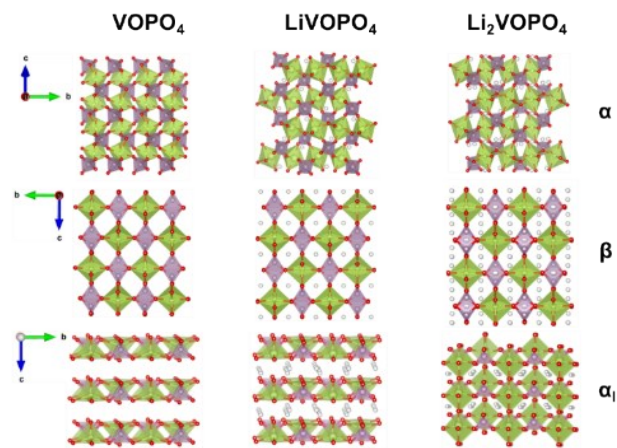

Figure S6. Crystal structures of three  $\text{VOPO}_4$ - $\text{LiVOPO}_4$ - $\text{Li}_2\text{VOPO}_4$  systems. Note the structure of  $\beta$ - $\text{Li}_2\text{VOPO}_4$  is just the approximate illustration.
